# Supplementary material
Source: publisher site journal article supplement (https://www.spandidos-publications.com/4493/downloadSupplementary)
Supplement: Supplementary file 1 [file downloadSupplementary]

## Sheet: 工作表 1 - Correlation analysis
Table SI. Correlation analysis between verified targets of ferroptosis.
Genes	CHAC1	TF	HSPB1	PTGS2	FTH1	GPX4	SLC40A1	TFRC	NFE2L2
CHAC1	1	0.0804128	0.0536946	-0.0350882	-0.0729988	-0.105884	-0.0723011	0.0507975	0.131467
TF	0.0804128	1	0.145783	0.00555228	0.0213404	0.0345382	0.105473	0.1639	0.214226
HSPB1	0.0536946	0.145783	1	-0.187842	-0.149899	0.0844323	-0.208013	-0.096469	0.0471712
PTGS2	-0.0350882	0.00555228	-0.187842	1	0.0862251	-0.0299167	-0.0882988	0.147269	0.13064
FTH1	-0.0729988	0.0213404	-0.149899	0.0862251	1	0.477617	0.275161	0.47435	0.269267
GPX4	-0.105884	0.0345382	0.0844323	-0.0299167	0.477617	1	0.152303	0.236418	0.0862532
SLC40A1	-0.0723011	0.105473	-0.208013	-0.0882988	0.275161	0.152303	1	0.218357	0.282271
TFRC	0.0507975	0.1639	-0.096469	0.147269	0.47435	0.236418	0.218357	1	0.533953
NFE2L2	0.131467	0.214226	0.0471712	0.13064	0.269267	0.0862532	0.282271	0.533953	1
